# Supplementary material for: Adam21 is dispensable for reproductive processes in mice
Source: PeerJ. 2021 Sep 23;9:e12210. doi: 10.7717/peerj.12210 (PMC8465997; doi:10.7717/peerj.12210)
Supplement: Supplemental Information 1 [file peerj-09-12210-s001.xlsx]

## Sheet: Sheet1
male fertility
Het		KO
1	9.2	1		8.5
2	8.4	2		8.8
3	9	3		8.8
4	8.8	4		7.8
female fertility
Het		KO
1	8.7	1		8.7
2	7.3	2		8.3
3	8.7	3		8.3
