# Supplementary material for: Adam21 is dispensable for reproductive processes in mice
Source: PeerJ. 2021 Sep 23;9:e12210. doi: 10.7717/peerj.12210 (PMC8465997; doi:10.7717/peerj.12210)
Supplement: Supplemental Information 2 [file peerj-09-12210-s002.xlsx]

## Sheet: Sheet1
genotype	FSH （mIU/ml)	LH （mIU/ml)	T （ng/ml)
ko
1	11.5985	15.2765	0.332155
2	13.1519	22.784	0.438913
3	10.6485	15.7638	0.481675
4	11.6735	18.2999	0.336824
5	13.0944	21.2083	0.435655
6	14.9305	17.1871	0.620782
7	10.9476	15.9362	0.293712
8	7.63807	16.7313	0.138826
9	11.825	20.4987	0.346196
10	14.6468	21.5996	0.583677
wt
1	13.6082	17.419	0.476702
2	14.7295	21.0701	0.592434
3	14.8799	26.6828	0.613646
4	13.6987	21.5996	0.219851
5	9.72961	20.0992	0.229904
6	9.90661	20.1785	0.238603
7	11.1124	20.3114	0.302858
8	8.49303	8.76213	0.172682
9	9.5558	20.9328	0.221281
