# Supplementary material for: Adam21 is dispensable for reproductive processes in mice
Source: PeerJ. 2021 Sep 23;9:e12210. doi: 10.7717/peerj.12210 (PMC8465997; doi:10.7717/peerj.12210)
Supplement: Supplemental Information 5 [file peerj-09-12210-s005.xlsx]

## Sheet: Sheet1
genotype	mobility(%)	Progressive spermatozoa(%)	VAP(μm/s)	VSL(μm/s)	VCL(μm/s)
WT
1	90	15	122.7	74	191.3
2	88	14	133.2	80.4	192.8
3	91	14	131	76.3	201.6
4	85	19	192.6	123.7	285.9
5	88	23	154.3	100	230.6
6	78	18	156.8	102.3	234.3
KO
1	88	19	124	84.5	203.1
2	90	14	143.1	90.1	209.6
3	83	19	126.7	84.7	184.9
4	84	17	120.3	77.3	182.8
5	86	19	189.1	119.5	279.5
6	76	20	136.6	84.7	206.5
