# Supplementary material for: Adam21 is dispensable for reproductive processes in mice
Source: PeerJ. 2021 Sep 23;9:e12210. doi: 10.7717/peerj.12210 (PMC8465997; doi:10.7717/peerj.12210)
Supplement: Supplemental Information 6 [file peerj-09-12210-s006.xlsx]

## Sheet: Sheet1
genotype	TS(106)
ko
1	9.5
2	5.5
3	19.8
4	10.7
5	23
6	13.8
7	18.7
8	18
9	20.8
10	19
11	13.7
12	16.7
13	14
wt
1	10
2	7.5
3	16
4	19.7
5	18.5
6	27
7	18.5
8	17.8
9	10.8
10	18.3
