# Supplementary material for: Adam21 is dispensable for reproductive processes in mice
Source: PeerJ. 2021 Sep 23;9:e12210. doi: 10.7717/peerj.12210 (PMC8465997; doi:10.7717/peerj.12210)
Supplement: Supplemental Information 7 [file peerj-09-12210-s007.xlsx]

## Sheet: Sheet1
genotype	BW	TW	TW/BW
ko
1	26.04	0.086	0.00330261
2	25.2	0.0947	0.00375794
3	22.37	0.0745	0.00333035
4	25.89	0.0944	0.0036462
5	27.79	0.1207	0.00434329
6	22.3	0.0662	0.00296861
7	28.3	0.1195	0.00422261
8	26.32	0.1152	0.0043769
9	24.93	0.0843	0.00338147
10	26.77	0.1016	0.00379529
11	25.05	0.1015	0.0040519
12	28.38	0.1083	0.00381607
13	22.51	0.0855	0.00379831
wt
1	23.85	0.0772	0.0032369
2	23.08	0.0693	0.0030026
3	23.1	0.0742	0.00321212
4	30.69	0.1112	0.00362333
5	25.97	0.094	0.00361956
6	26.3	0.092	0.0034981
7	25.48	0.0923	0.00362245
8	27.03	0.1074	0.00397336
9	25.61	0.0738	0.00288169
10	28.26	0.1022	0.00361642
